# Supplementary material for: Morphometric and meristic diversity of the species Androctonus crassicauda (Olivier, 1807) (Scorpiones: Buthidae) in Saudi Arabia
Source: PeerJ. 2022 Oct 19;10:e14198. doi: 10.7717/peerj.14198 (PMC9587716; doi:10.7717/peerj.14198)
Supplement: File S1 [file peerj-10-14198-s001.xlsx]

## Sheet: Data
NO	Site	Ecogeographical_regions	Region	Sex	TBL	CL	CAW	CPW	T7_L	T7_W	Sw7_L	Sw7_W	PL	M1st_L	M1st_W	M1st_H	M2nd_L	M2nd_W	M2nd_H	M3rd_L	M3rd_W	M3rd_H	M4th___L	M4th__W	M4th_H	M5th___L	M5th_W	M5th_H	TL	Vescile_L	Vescile_W	Vescile_H	Femur_L	Femur_W	Femur_H	patella_L	patella_W	patella_H	Chela_L	Chela_Manus_L	Chela_Manus_W	Chela_Manus_H	Mov__Finger_L	Mov__Finger__denticles_count	fixed_Finger__denticles_count2	Pecten_teeth_count_Right	Pecten_teeth_count_Left	M2nd_denticles_count	M3rd_denticles_count
1	Riyadh	OTU2	Riyadh	Female	66.06	7.55	5.17	7.92	5.02	8.06	3.84	7.82	5.92	5.83	5	4.58	6.28	5.13	4.64	6.47	5.37	4.96	6.99	5.2	4.84	8.87	4.69	3.8	6.92	4.31	2.86	2.47	5.7	1.94	11.67	6.87	2.78	2.11	12.98	4.46	2.67	2.91	8.52	16	14	26	26	25	26
2	Riyadh	OTU2	Riyadh	Female	66.06	7.55	5.17	7.92	5.02	8.06	3.84	7.82	5.92	5.83	5	4.58	6.28	5.13	4.64	6.47	5.37	4.96	6.99	5.2	4.84	8.87	4.69	3.8	6.92	4.31	2.86	2.47	5.7	1.94	11.67	6.87	2.78	2.11	12.98	4.46	2.67	2.91	8.52	16	14	26	26	25	26
3	Khurais	OTU2	Eastern Province	Female	75.29	7.97	5.21	7.78	4.9	7.61	4.62	7.39	7.39	6.17	5.06	4.61	6.47	5.3	4.73	6.71	5.85	5.1	7.19	5.71	5.24	7.65	4.91	4.25	7.75	4.55	3.17	2.72	6.56	2.45	1.84	7.73	3.12	2.36	13.42	4.55	2.48	3.23	9.09	15	14	28	28	31	33
4	Khurais	OTU2	Eastern Province	Female	75.29	7.97	5.21	7.78	4.9	7.61	4.62	7.39	7.39	6.17	5.06	4.61	6.47	5.3	4.73	6.71	5.85	5.1	7.19	5.71	5.24	7.65	4.91	4.25	7.75	4.55	3.17	2.72	6.56	2.45	1.84	7.73	3.12	2.36	13.42	4.55	2.48	3.23	9.09	15	14	28	28	31	33
5	Buraydah	OTU2	Al Qassim	Female	84.36	9.69	6.48	9.18	5.57	8.22	5.71	8.76	7.35	7.07	5.74	5.17	7.41	6.26	5.6	7.63	6.57	5.53	8.48	6.35	6.32	10.84	6.02	5.05	9.05	7.48	2.64	1.87	8.48	3.4	2.62	9.06	3.44	2.86	15.19	5.06	3.13	3.69	10.41	15	15	27	26	30	30
6	Buraydah	OTU2	Al Qassim	Female	84.36	9.69	6.48	9.18	5.57	8.22	5.71	8.76	7.35	7.07	5.74	5.17	7.41	6.26	5.6	7.63	6.57	5.53	8.48	6.35	6.32	10.84	6.02	5.05	9.05	7.48	2.64	1.87	8.48	3.4	2.62	9.06	3.44	2.86	15.19	5.06	3.13	3.69	10.41	15	15	27	26	30	30
7	Khurais	OTU2	Eastern Province	Female	78.68	10.8	6.96	11.57	5.18	9.17	4.36	9.48	5.86	7.64	6.27	5.83	7.88	7.39	6.18	8.24	8.14	7.14	9.16	7.8	7.31	11.53	6.91	5.36	8.36	5.14	4.08	3.3	8.23	3.05	2.25	9.24	4.23	3.43	17.91	6.45	4.06	4.79	11.7	15	15	25	25	25	28
8	Khurais	OTU2	Eastern Province	Female	78.68	10.8	6.96	11.57	5.18	9.17	4.36	9.48	5.86	7.64	6.27	5.83	7.88	7.39	6.18	8.24	8.14	7.14	9.16	7.8	7.31	11.53	6.91	5.36	8.36	5.14	4.08	3.3	8.23	3.05	2.25	9.24	4.23	3.43	17.91	6.45	4.06	4.79	11.7	15	15	25	25	25	28
9	Khurais	OTU2	Eastern Province	Female	71.59	8.51	6.4	9	4.57	7.94	4.14	7.27	6.34	6.37	5.37	4.53	6.66	5.45	4.93	7.13	5.83	7.42	7.51	5.9	5.5	9.82	5.25	4.26	7.74	4.49	3.21	2.8	7.19	2.43	1.89	8.27	3.33	2.65	14.16	4.72	3.08	3.27	9.72	15	15	24	24	31	30
10	Khurais	OTU2	Eastern Province	Female	71.59	8.51	6.4	9	4.57	7.94	4.14	7.27	6.34	6.37	5.37	4.53	6.66	5.45	4.93	7.13	5.83	7.42	7.51	5.9	5.5	9.82	5.25	4.26	7.74	4.49	3.21	2.8	7.19	2.43	1.89	8.27	3.33	2.65	14.16	4.72	3.08	3.27	9.72	15	15	24	24	31	30
11	Khurais	OTU2	Eastern Province	Female	87.02	10.9	7.99	11.54	5.82	10.33	4.61	9.68	9.32	8.16	6.58	6.06	8.78	7.74	6.66	9.07	8.2	7.54	9.89	8.01	7.59	12.38	6.87	6.03	9.17	6.02	4.29	3.26	8.03	2.73	2.48	9.88	4.32	3.26	17.94	6.6	4.49	5.18	11.23	15	13	23	24	31	31
12	Khurais	OTU2	Eastern Province	Female	87.02	10.9	7.99	11.54	5.82	10.33	4.61	9.68	9.32	8.16	6.58	6.06	8.78	7.74	6.66	9.07	8.2	7.54	9.89	8.01	7.59	12.38	6.87	6.03	9.17	6.02	4.29	3.26	8.03	2.73	2.48	9.88	4.32	3.26	17.94	6.6	4.49	5.18	11.23	15	13	23	24	31	31
13	Dumah Al Jandal	OTU1	Al Jowf	Female	67.57	8.06	5.09	8.3	5.94	7.93	4.53	6.45	6.42	5.93	5.02	4.5	6.37	5.38	4.7	6.59	5.45	5.04	7.13	5.22	4.9	8.85	4.72	4.07	7.72	4.42	3.22	2.87	6.29	2.23	1.84	7.71	3.09	2.13	12.87	5.39	2.32	2.92	7.48	15	14	26	27	27	27
14	Dumah Al Jandal	OTU1	Al Jowf	Female	67.57	8.06	5.09	8.3	5.94	7.93	4.53	6.45	6.42	5.93	5.02	4.5	6.37	5.38	4.7	6.59	5.45	5.04	7.13	5.22	4.9	8.85	4.72	4.07	7.72	4.42	3.22	2.87	6.29	2.23	1.84	7.71	3.09	2.13	12.87	5.39	2.32	2.92	7.48	15	14	26	27	27	27
15	Arar	OTU1	Northern Borders Province	Female	61.26	7.71	5.33	7.1	4.7	7.47	4.23	6.81	6.24	5.57	4.66	4.14	6.03	4.96	4.26	6.29	5.07	4.76	6.58	4.86	4.54	8.38	4.48	3.7	6.97	4.1	2.77	2.36	6.12	2.44	1.66	6.84	2.86	2.41	12.31	4.18	2.18	2.66	8.13	14	14	24	23	29	31
16	Arar	OTU1	Northern Borders Province	Female	61.26	7.71	5.33	7.1	4.7	7.47	4.23	6.81	6.24	5.57	4.66	4.14	6.03	4.96	4.26	6.29	5.07	4.76	6.58	4.86	4.54	8.38	4.48	3.7	6.97	4.1	2.77	2.36	6.12	2.44	1.66	6.84	2.86	2.41	12.31	4.18	2.18	2.66	8.13	14	14	24	23	29	31
17	Arar	OTU1	Northern Borders Province	Female	75.57	8.79	6.01	8.97	5.85	8.25	4.8	7.85	7.51	6.56	5.25	5.05	7.11	5.92	5.18	7.36	6.58	5.78	7.94	6.43	5.64	9.95	5.76	4.76	7.72	5.09	3.5	3.33	7.52	2.41	1.99	7.88	3.12	2.8	14.88	5.06	3.12	3.5	9.82	15	13	26	26	26	25
18	Arar	OTU1	Northern Borders Province	Female	75.57	8.79	6.01	8.97	5.85	8.25	4.8	7.85	7.51	6.56	5.25	5.05	7.11	5.92	5.18	7.36	6.58	5.78	7.94	6.43	5.64	9.95	5.76	4.76	7.72	5.09	3.5	3.33	7.52	2.41	1.99	7.88	3.12	2.8	14.88	5.06	3.12	3.5	9.82	15	13	26	26	26	25
19	East of Al Qunfudhah	OTU4	Makkah	Female	83.35	9.6	6.67	10.47	5.25	10.21	4.81	10.21	8.33	7.79	6.59	5.74	8.27	7.32	6.21	8.5	7.53	7.45	9.08	7.56	7.15	11.1	6.73	5.62	9.6	5.57	3.93	3.54	7.52	2.8	2.35	8.93	3.95	3.28	16.79	5.95	3.61	5.08	11.03	14	13	25	25	32	29
20	East of Al Qunfudhah	OTU4	Makkah	Female	83.35	9.6	6.67	10.47	5.25	10.21	4.81	10.21	8.33	7.79	6.59	5.74	8.27	7.32	6.21	8.5	7.53	7.45	9.08	7.56	7.15	11.1	6.73	5.62	9.6	5.57	3.93	3.54	7.52	2.8	2.35	8.93	3.95	3.28	16.79	5.95	3.61	5.08	11.03	14	13	25	25	32	29
21	East of Al Qunfudhah	OTU4	Makkah	Female	79.11	10.41	7.04	10.64	5.27	9.71	4.37	9.92	8.84	7.56	6.22	3.73	8.16	7.19	6.4	8.49	7.77	7.03	9.13	7.88	6.88	11.55	6.42	5.52	9.85	5.72	3.82	3.23	8.13	3.03	2.31	9.53	4.15	3.43	16.6	6.28	4.29	4.73	10.32	13	14	26	26	36	35
22	East of Al Qunfudhah	OTU4	Makkah	Female	79.11	10.41	7.04	10.64	5.27	9.71	4.37	9.92	8.84	7.56	6.22	3.73	8.16	7.19	6.4	8.49	7.77	7.03	9.13	7.88	6.88	11.55	6.42	5.52	9.85	5.72	3.82	3.23	8.13	3.03	2.31	9.53	4.15	3.43	16.6	6.28	4.29	4.73	10.32	13	14	26	26	36	35
23	East of Al Qunfudhah	OTU4	Makkah	Female	78.31	9.83	6.56	9.41	5.34	9.59	4.1	9.4	7.45	7.02	6.29	5.43	7.52	6.97	5.87	7.99	7.38	6.57	8.62	7.25	6.52	10.84	6.4	5.26	9.06	5.2	3.73	3.22	7.65	2.61	2.23	8.98	3.67	3.42	16.36	6.36	4.03	4.99	10.71	15	14	25	24	31	31
24	East of Al Qunfudhah	OTU4	Makkah	Female	78.31	9.83	6.56	9.41	5.34	9.59	4.1	9.4	7.45	7.02	6.29	5.43	7.52	6.97	5.87	7.99	7.38	6.57	8.62	7.25	6.52	10.84	6.4	5.26	9.06	5.2	3.73	3.22	7.65	2.61	2.23	8.98	3.67	3.42	16.36	6.36	4.03	4.99	10.71	15	14	25	24	31	31
25	East of Al Qunfudhah	OTU4	Makkah	Female	81.66	10.21	6.55	9.61	5.19	10.37	4.45	9.91	7.99	7.58	6.46	5.57	8.23	6.76	5.92	8.44	7.47	6.64	9.25	7.43	6.65	11.46	6.44	5.31	9.2	5.9	3.89	3.08	7.43	3.09	2.3	9.2	4.22	3.29	16.61	6.155	4.09	5.09	10.7	15	14	25	26	30	29
26	East of Al Qunfudhah	OTU4	Makkah	Female	81.66	10.21	6.55	9.61	5.19	10.37	4.45	9.91	7.99	7.58	6.46	5.57	8.23	6.76	5.92	8.44	7.47	6.64	9.25	7.43	6.65	11.46	6.44	5.31	9.2	5.9	3.89	3.08	7.43	3.09	2.3	9.2	4.22	3.29	16.61	6.155	4.09	5.09	10.7	15	14	25	26	30	29
27	Tathleeth	OTU3	Aseer	Female	95.89	11.92	8.33	11.47	7.07	10.96	5.54	11.41	8.97	8.57	7.9	6.33	9	8.77	7.49	9.4	9.28	8.8	9.84	8.78	9.89	12.85	8.01	6.73	10.69	5.52	4.66	3.63	9.29	3.39	2.73	11.08	4.61	4.03	19.46	8.01	4.67	5.53	13.05	15	14	25	26	29	32
28	Tathleeth	OTU3	Aseer	Female	84.47	10.33	7.34	10.91	5.97	10.14	4.75	10.05	8.86	7.09	7.55	6.25	8.81	7.75	6.78	8.98	8.83	7.52	9.54	8.54	7.7	12.35	7.39	6.05	9	5.56	4.43	3.58	8.13	2.59	2.31	9.88	4.32	3.63	17.29	5.55	4.24	4.81	11.46	15	14	25	27	31	32
29	Tathleeth	OTU3	Aseer	Female	66.9	8.38	5.1	8.52	5.03	8.03	3.87	7.73	6.7	6.3	5.52	4.72	6.73	5.81	4.91	6.9	6.09	5.78	7.47	6.48	5.44	9.57	5.57	4.73	8.6	4.38	3.4	2.75	6.74	2.48	1.79	7.87	3.25	2.84	13.92	4.52	2.86	3.48	9.4	14	14	26	27	26	23
30	Tathleeth	OTU3	Aseer	Female	95.89	11.92	8.33	11.47	7.07	10.96	5.54	11.41	8.97	8.57	7.9	6.33	9	8.77	7.49	9.4	9.28	8.8	9.84	8.78	9.89	12.85	8.01	6.73	10.69	5.52	4.66	3.63	9.29	3.39	2.73	11.08	4.61	4.03	19.46	8.01	4.67	5.53	13.05	15	14	25	26	29	32
31	Tathleeth	OTU3	Aseer	Female	84.47	10.33	7.34	10.91	5.97	10.14	4.75	10.05	8.86	7.09	7.55	6.25	8.81	7.75	6.78	8.98	8.83	7.52	9.54	8.54	7.7	12.35	7.39	6.05	9	5.56	4.43	3.58	8.13	2.59	2.31	9.88	4.32	3.63	17.29	5.55	4.24	4.81	11.46	15	14	25	27	31	32
32	Tathleeth	OTU3	Aseer	Female	66.9	8.38	5.1	8.52	5.03	8.03	3.87	7.73	6.7	6.3	5.52	4.72	6.73	5.81	4.91	6.9	6.09	5.78	7.47	6.48	5.44	9.57	5.57	4.73	8.6	4.38	3.4	2.75	6.74	2.48	1.79	7.87	3.25	2.84	13.92	4.52	2.86	3.48	9.4	14	14	26	27	26	23
33	East of Al Qunfudhah	OTU4	Makkah	Female	70.64	10.56	5.68	9.87	4.86	8.81	4.8	8.97	7.73	6.66	5.7	5.03	7.29	6.18	5.33	7.62	6.52	5.69	8.14	6.27	5.66	8.51	5.47	4.38	8.59	4.39	3.4	2.8	6.06	2.27	2.48	8.57	3.41	2.92	14.26	4.59	3.1	3.62	9.88	14	13	26	25	25	30
34	East of Al Qunfudhah	OTU4	Makkah	Female	65.25	8.11	5.4	8.94	4.19	7.35	4.16	7.62	6.74	6.13	5.11	4.26	6.61	5.36	4.75	6.71	5.49	5.15	7.24	5.59	4.84	9.14	5	4.1	7.99	4.28	3.09	2.46	6.06	2.19	1.81	7.99	3.05	2.14	13.49	4.68	2.87	3.37	9.44	14	14	24	24	24	29
35	East of Al Qunfudhah	OTU4	Makkah	Female	64.76	7.59	4.82	7.46	3.7	7.25	3.71	6.86	7.54	6.29	5.07	4.26	6.8	5.42	4.82	6.97	5.64	5.14	7.55	5.5	4.98	9.21	4.8	3.96	7.71	7.37	2.97	2.49	6.41	2.16	1.66	7.18	2.68	2.44	12.56	4.51	2.65	3.05	8.87	14	14	28	31	30	30
36	East of Al Qunfudhah	OTU4	Makkah	Female	84.92	9.77	6.2	9.57	6.62	9.1	5.22	9.45	8.33	7.47	6.21	5.52	7.99	7.12	5.94	8.18	7.67	6.64	8.63	7.5	6.88	10.72	6.62	5.3	9.31	4.98	3.81	3.27	7.73	2.72	2.39	8.43	4.01	3.25	16.56	6.36	4.33	5.11	10.92	15	14	25	25	29	30
37	Arar	OTU1	Northern Borders Province	Female	65.44	8.81	5.45	10.04	4.33	8.09	2.85	7.37	7.14	6.43	5.72	4.83	6.84	5.95	5.17	7.04	6.25	5.55	7.88	6.21	5.52	9.65	5.55	4.57	8.33	4.41	3.52	2.95	6.77	2.71	2.02	8.33	3.34	2.76	14.97	5.33	2.96	3.87	10.43	15	15			26	26
38	East of Al Qunfudhah	OTU4	Makkah	Female	59.6	7.9	5.41	8.33	3.84	7.51	2.97	6.83	7.95	6.34	4.83	4.01	6.88	5.15	4.42	6.75	5.49	4.73	7.52	5.39	4.57	8.95	4.75	3.79	7.62	3.69	2.78	2.82	5.33	2.23	1.84	7.64	3	2.33	12.97	4.47	2.49	3.02	8.68	15	14			27	30
39	Arar	OTU1	Northern Borders Province	Female	65.42	8.65	5.27	10.05	4.04	8.47	3.44	7.98	6.6	6.72	5.67	5.03	7.63	6.03	5.31	7.69	6.2	5.67	8.03	6.24	5.76	8.29	5.67	4.49	8.61	5.03	3.54	2.79	6.35	2.28	1.88	8.42	3.48	2.66	14.96	5.31	3.01	3.72	10.02	14	14			25	26
40	Tathleeth	OTU3	Aseer	Female	62.78	7.68	4.89	7.64	4.17	6.98	3.68	7.33	8.04	5.87	5.11	4.3	6.6	5.24	4.68	6.51	5.63	5.19	7.07	5.76	4.92	9.02	5.12	3.95	7.85	4.48	3.06	2.42	6.13	2.31	1.66	7.97	2.91	2.25	13.42	5.01	2.43	3.06	8.6	15	14	33	33	27	27
[truncated: 19 more columns]
