# Supplementary material for: Morphometric and meristic diversity of the species Androctonus crassicauda (Olivier, 1807) (Scorpiones: Buthidae) in Saudi Arabia
Source: PeerJ. 2022 Oct 19;10:e14198. doi: 10.7717/peerj.14198 (PMC9587716; doi:10.7717/peerj.14198)
Supplement: File S2 [file peerj-10-14198-s002.xlsx]

## Sheet: Data
NO	Site	Ecogeographical_regions	Region	Sex	TBL	CL	CAW	CPW	T7_L	T7_W	Sw7_L	Sw7_W	PL	M1st_L	M1st_W	M1st_H	M2nd_L	M2nd_W	M2nd_H	M3rd_L	M3rd_W	M3rd_H	M4th___L	M4th__W	M4th_H	M5th___L	M5th_W	M5th_H	TL	Vescile_L	Vescile_W	Vescile_H	Femur_L	Femur_W	Femur_H	patella_L	patella_W	patella_H	Chela_L	Chela_Manus_L	Chela_Manus_W	Chela_Manus_H	Mov__Finger_L	Mov__Finger__denticles_count	fixed_Finger__denticles_count2	Pecten_teeth_count_Right	Pecten_teeth_count_Left	M2nd_denticles_count	M3rd_denticles_count
41	Arar	OTU1	Northern Borders Province	Male	80.41	9.31	6.81	8.96	6.96	6.43	6.77	7.73	8.86	7.35	6.51	5.47	7.66	6.83	6.26	8.22	7.72	7.31	8.85	7.72	7.34	11.02	6.75	5.84	8.71	4.86	3.5	3.07	7.85	2.45	2.22	8.99	5.7	2.87	16.08	5.99	3.69	4.43	10.5	14.5	14	30.5	31.5	29	31.5
42	Arar	OTU1	Northern Borders Province	Male	74.47	9.83	5.78	11.31	5.38	9.56	3.52	8.35	10.12	7.73	7.11	6.33	8.53	7.9	6.99	8.8	8.39	7.76	9.2	8.53	8.07	11.73	7.1	6.19	9.53	5.48	3.96	3.23	7.67	2.97	2.36	9.44	4.11	3.43	16.56	6.17	4.86	5.26	11.04	15	15	31	31	27	30
43	Arar	OTU1	Northern Borders Province	Male	77.4	10.21	6.4	11.2	5.3	10.24	4.55	9.7	11.13	8.41	7.57	6.5	9.24	8.1	7.15	9.58	8.86	8.35	9.82	8.88	7.97	12.27	7.88	6.24	9.96	5.61	3.99	3.26	8.99	3.28	2.69	9.88	4.33	3.56	17.62	6.1	4.79	5.71	11.78	15	14	32	32	29	31
44	Arar	OTU1	Northern Borders Province	Male	80.41	9.31	6.81	8.96	6.96	6.43	6.77	7.73	8.86	7.35	6.51	5.47	7.66	6.83	6.26	8.22	7.72	7.31	8.85	7.72	7.34	11.02	6.75	5.84	8.71	4.86	3.5	3.07	7.85	2.45	2.22	8.99	5.7	2.87	16.08	5.99	3.69	4.43	10.5	14.5	14	30.5	31.5	29	31.5
45	Arar	OTU1	Male	Male	74.47	9.83	5.78	11.31	5.38	9.56	3.52	8.35	10.12	7.73	7.11	6.33	8.53	7.9	6.99	8.8	8.39	7.76	9.2	8.53	8.07	11.73	7.1	6.19	9.53	5.48	3.96	3.23	7.67	2.97	2.36	9.44	4.11	3.43	16.56	6.17	4.86	5.26	11.04	15	15	31	31	27	30
46	Arar	OTU1	Male	Male	77.42	10.21	6.4	11.2	5.3	10.24	4.55	9.7	11.13	8.41	7.57	6.5	9.24	8.1	7.15	9.58	8.86	8.35	9.82	8.88	7.97	12.27	7.88	6.24	9.96	5.61	3.99	3.26	8.99	3.28	2.69	9.88	4.33	3.56	17.62	6.1	4.79	5.71	11.78	15	14	32	32	29	31
47	Hail	OTU2	Hail Province	Male	90.45	10.11	7.55	9.63	5.66	9.44	5.92	8.96	9.79	8.18	7.31	6.13	8.31	7.55	7.09	9.15	9.19	8.64	9.99	9.32	8.78	12.01	8.05	6.88	8.87	5.2	3.79	3.21	8.69	2.72	2.34	9.44	4.11	3.13	18.25	6.93	4.58	5.69	11.66	14	14	31	32	29	32
48	Hail	OTU2	Hail Province	Male	70.36	8.5	6.07	8.28	8.26	3.42	7.61	6.5	7.93	6.51	5.7	4.8	7	6.1	5.43	7.28	6.25	5.97	7.7	6.12	5.9	10.02	5.45	4.79	8.55	4.51	3.2	2.93	7	2.17	2.1	8.53	7.28	2.61	13.9	5.04	2.8	3.17	9.34	15	14	30	31	29	31
49	Khurais	OTU2	Eastern Province	Male	65.74	7.75	6	8.11	4.94	7.18	4.61	6.96	7.41	5.73	4.98	4.17	6.21	5.1	4.3	6.39	5.28	4.8	6.99	5.48	4.98	7.31	5.03	4	7	3.89	3.03	2.29	6.22	2.06	1.74	7.67	3	2.22	13.12	4.5	2.27	3.13	8.79	14	14	32	33	33	30
50	Buraydah	OTU2	Al Qassim	Male	77.54	8.74	5.76	8.24	5.13	8.32	5.68	7.98	8.01	6.71	5.94	4.76	7.23	6.32	5.29	7.33	6.63	5.95	7.93	6.4	5.88	10.01	5.6	4.75	8.27	4.84	3.32	2.78	7.06	2.54	2.03	8.03	3.37	2.52	14.43	5.52	2.95	3.73	9.71	15	14	34	35	31	28
51	Khurais	OTU2	Eastern Province	Male	77.24	9.46	6.83	9.28	5.37	8.58	4.04	8.72	10.09	7.07	6.15	5.32	7.77	7.13	6.27	8.03	8.05	7.02	8.55	8.08	7.06	10.78	7.13	5.47	8.79	5.35	3.65	2.91	6.87	2.55	1.86	8.61	3.62	2.41	15.82	6.11	4.09	4.78	10.3	14	14	33	34	29	31
52	Dhurma	OTU2	Riyadh	Male	62.66	7.42	5.3	7.73	4.68	7.43	3.66	6.44	8.16	5.81	4.62	3.87	6.42	5.32	4.67	6.56	5.4	4.96	7.09	5.3	5	8.99	4.77	4.15	7.7	4.15	2.88	2.46	6.49	1.93	1.83	7.16	3.03	2.68	13.62	4.53	2.56	3.28	9.03	14	14	33	32	29	29
53	Dhurma	OTU2	Riyadh	Male	70	8.82	6.3	9.35	5.32	8.16	3.7	8.14	7.95	6.69	5.15	4.59	7.27	5.88	5.31	7.57	5.94	5.67	8.03	5.9	5.62	10.13	5.51	4.47	7.8	4.51	3.35	2.56	6.8	2.31	1.58	8.43	3.58	2.5	14.39	5.17	2.99	3.31	9.68	15	14	31	30	28	28
54	Hail	OTU2	Hail Province	Male	90.45	10.11	7.55	9.63	5.66	9.44	5.92	8.96	9.79	8.18	7.31	6.13	8.31	7.55	7.09	9.15	9.19	8.64	9.99	9.32	8.78	12.01	8.05	6.88	8.87	5.2	3.79	3.21	8.69	2.72	2.34	9.44	4.11	3.13	18.25	6.93	4.58	5.69	11.66	14	14	31	32	29	32
55	Hail	OTU2	Hail Province	Male	70.36	8.5	6.07	8.28	8.26	3.42	7.61	6.5	7.93	6.51	5.7	4.8	7	6.1	5.43	7.28	6.25	5.97	7.7	6.12	5.9	10.02	5.45	4.79	8.55	4.51	3.2	2.93	7	2.17	2.1	8.53	7.28	2.61	13.9	5.04	2.8	3.17	9.34	15	14	30	31	29	31
56	Khurais	OTU2	Eastern Province	Male	65.74	7.75	6	8.11	4.94	7.18	4.61	6.96	7.41	5.73	4.98	4.17	6.21	5.1	4.3	6.39	5.28	4.8	6.99	5.48	4.98	7.31	5.03	4	7	3.89	3.03	2.29	6.22	2.06	1.74	7.67	3	2.22	13.12	4.5	2.27	3.13	8.79	14	14	32	33	33	30
57	Buraydah	OTU2	Al Qassim	Male	77.55	8.74	5.76	8.24	5.13	8.32	5.68	7.98	8.01	6.71	5.94	4.76	7.23	6.32	5.29	7.33	6.63	5.95	7.93	6.4	5.88	10.01	5.6	4.75	8.27	4.84	3.32	2.78	7.06	2.54	2.03	8.03	3.37	2.52	14.43	5.52	2.95	3.73	9.71	15	14	34	35	31	28
58	Khurais	OTU2	Eastern Province	Male	77.22	9.46	6.83	9.28	5.37	8.58	4.04	8.72	10.09	7.07	6.15	5.32	7.77	7.13	6.27	8.03	8.05	7.02	8.55	8.08	7.06	10.78	7.13	5.47	8.79	5.35	3.65	2.91	6.87	2.55	1.86	8.61	3.62	2.41	15.82	6.11	4.09	4.78	10.3	14	14	33	34	29	31
59	Dhurma	OTU2	Riyadh	Male	62.66	7.42	5.3	7.73	4.68	7.43	3.66	6.44	8.16	5.81	4.62	3.87	6.42	5.32	4.67	6.56	5.4	4.96	7.09	5.3	5	8.99	4.77	4.15	7.7	4.15	2.88	2.46	6.49	1.93	1.83	7.16	3.03	2.68	13.62	4.53	2.56	3.28	9.03	14	14	33	32	29	29
60	Dhurma	OTU2	Riyadh	Male	70.01	8.82	6.3	9.35	5.32	8.16	3.7	8.14	7.95	6.69	5.15	4.59	7.27	5.88	5.31	7.57	5.94	5.67	8.03	5.9	5.62	10.13	5.51	4.47	7.8	4.51	3.35	2.56	6.8	2.31	1.58	8.43	3.58	2.5	14.39	5.17	2.99	3.31	9.68	15	14	31	30	28	28
61	Tathleeth	OTU3	Aseer	Male	79.17	9.46	6.4	9.83	5.15	8.18	4.57	9.04	11.25	7.49	6.85	5.99	8.12	7.84	6.79	8.13	8.4	7.51	8.93	8.44	7.44	11.67	7.29	5.88	8.82	4.75	3.82	3.78	8.21	2.91	2.56	9.26	3.59	3.14	16.44	6.19	4.53	4.41	10.86	14	12	35	33	30	30
62	Tathleeth	OTU3	Aseer	Male	70.05	9.4	6.75	9.95	5.49	9.16	4.21	8.57	10.17	5.76	7.1	5.95	6.97	8.07	6.22	7.62	8.94	7.81	8.43	8.39	7.75	10.71	7.47	6.27	8.93	5.09	3.61	3.11	7.78	3.05	2.37	9.13	4.06	3.25	10.35	5.76	4.09	4.89	11.2	15	14	33	35	30	30
63	Wadi Al Shiq	OTU3	Aseer	Male	79.97	9.67	7.09	8.89	5.27	8.77	4.23	8.75	9.58	7.22	7.17	5.85	8	7.99	6.62	8.17	8.6	7.61	9.04	8.63	7.45	11.68	7.29	6.1	8.98	5.03	3.61	2.85	7.41	2.68	2.08	8.55	4.02	3.02	15.82	5.5	3.34	4.27	10.22	15	14	31	31	31	31
64	Tathleeth	OTU3	Aseer	Male	67.5	8.28	5.59	8.45	4.67	8.24	3.9	7.39	8.39	6.55	5.32	4.31	6.9	5.77	5.07	7.02	6.2	5.54	7.56	6.26	5.41	9.63	5.46	4.44	7.93	4.88	3.29	2.97	6.54	2.24	1.83	7.7	3.28	2.01	13.45	5.07	2.89	2.66	8.38	15	14	34	33	27	28
65	Tathleeth	OTU3	Aseer	Male	66.2	8.21	5.58	8.54	4.3	7.08	4.19	7.65	7.82	6.35	5.12	4.6	6.88	5.58	5.17	7.22	5.98	5.49	7.59	6.96	5.48	9.83	5.28	4.56	7.21	4.11	3.18	2.58	6.62	2.11	1.82	8.38	3.17	2.23	13.63	4.42	2.59	3.28	9.21	15	14	31	31	25	28
66	Tathleeth	OTU3	Aseer	Male	79.17	9.46	6.4	9.83	5.15	8.18	4.57	9.04	11.25	7.49	6.85	5.99	8.12	7.84	6.79	8.13	8.4	7.51	8.93	8.44	7.44	11.67	7.29	5.88	8.82	4.75	3.82	3.78	8.21	2.91	2.56	9.26	3.59	3.14	16.44	6.19	4.53	4.41	10.86	14	12	35	33	30	30
67	Tathleeth	OTU3	Aseer	Male	70.05	9.4	6.75	9.95	5.49	9.16	4.21	8.57	10.17	5.76	7.1	5.95	6.97	8.07	6.22	7.62	8.94	7.81	8.43	8.39	7.75	10.71	7.47	6.27	8.93	5.09	3.61	3.11	7.78	3.05	2.37	9.13	4.06	3.25	10.35	5.76	4.09	4.89	11.2	15	14	33	35	30	30
68	Wadi Al Shiq	OTU3	Aseer	Male	79.97	9.67	7.09	8.89	5.27	8.77	4.23	8.75	9.58	7.22	7.17	5.85	8	7.99	6.62	8.17	8.6	7.61	9.04	8.63	7.45	11.68	7.29	6.1	8.98	5.03	3.61	2.85	7.41	2.68	2.08	8.55	4.02	3.02	15.82	5.5	3.34	4.27	10.22	15	14	31	31	31	31
69	Tathleeth	OTU3	Aseer	Male	67.5	8.28	5.59	8.45	4.67	8.24	3.9	7.39	8.39	6.55	5.32	4.31	6.9	5.77	5.07	7.02	6.2	5.54	7.56	6.26	5.41	9.63	5.46	4.44	7.93	4.88	3.29	2.97	6.54	2.24	1.83	7.7	3.28	2.01	13.45	5.07	2.89	2.66	8.38	15	14	34	33	27	28
70	Tathleeth	OTU3	Aseer	Male	66.21	8.21	5.58	8.54	4.3	7.08	4.19	7.65	7.82	6.35	5.12	4.6	6.88	5.58	5.17	7.22	5.98	5.49	7.59	6.96	5.48	9.83	5.28	4.56	7.21	4.11	3.18	2.58	6.62	2.11	1.82	8.38	3.17	2.23	13.63	4.42	2.59	3.28	9.21	15	14	31	31	25	28
71	East of Al Qunfudhah	OTU4	Makkah	Male	79.26	9.38	6.08	9.2	4.89	9.32	4.11	8.17	10.55	7.45	6.3	5.58	7.86	7.5	5.88	8.39	8.22	6.63	8.79	8.34	7.14	10.81	7.11	5.63	8.58	4.96	3.42	2.75	7.44	2.6	0.11	8.68	3.85	3.19	10.12	6.11	4.45	5.05	10.47	14	14	32	33	31	30
72	East of Al Qunfudhah	OTU4	Makkah	Male	69.94	8.41	5.95	8.75	4.45	8.06	4.1	7.17	8.71	6.73	5.96	5.13	7.49	6.59	5.88	7.8	7.16	6.5	8.45	7.29	6.38	10.17	6.6	4.99	8.1	4.58	3.17	3.13	6.96	2.63	2.1	8.24	3.52	2.9	14.75	5.38	3.99	4.46	9.52	14	14	31	31	30	30
73	East of Al Qunfudhah	OTU4	Male	Male	77.5	9.4	6.3	9.58	5.07	8.35	4.54	8.97	9.02	7.49	6.83	5.74	8.24	7.51	6.38	8.54	8.3	7.31	9.23	8.17	7.13	11.02	7.19	5.46	8.95	5.11	3.49	2.83	6.97	2.75	2.3	8.97	3.81	3.26	15.32	6.07	4.25	4.74	10.39	14	13	31	31	28	30
74	East of Al Qunfudhah	OTU4	Male	Male	81.55	9.96	6.9	9.74	5.39	9.47	4.71	9.07	10	8	6.74	6.02	8.58	7.73	6.71	8.84	8.4	7.49	9.43	8.36	7.36	11.45	7.33	5.71	5.71	5	3.61	2.81	6.91	2.84	2.32	9.64	3.81	3.24	17.41	5.89	4.57	5.12	10.63	14	14	32	31	26	31
75	East of Al Qunfudhah	OTU4	Makkah	Male	79.26	9.38	6.08	9.2	4.89	9.32	4.11	8.17	10.55	7.45	6.3	5.58	7.86	7.5	5.88	8.39	8.22	6.63	8.79	8.34	7.14	10.81	7.11	5.63	8.58	4.96	3.42	2.75	7.44	2.6	0.11	8.68	3.85	3.19	10.12	6.11	4.45	5.05	10.47	14	14	32	33	31	30
76	East of Al Qunfudhah	OTU4	Makkah	Male	69.94	8.41	5.95	8.75	4.45	8.06	4.1	7.17	8.71	6.73	5.96	5.13	7.49	6.59	5.88	7.8	7.16	6.5	8.45	7.29	6.38	10.17	6.6	4.99	8.1	4.58	3.17	3.13	6.96	2.63	2.1	8.24	3.52	2.9	14.75	5.38	3.99	4.46	9.52	14	14	31	31	30	30
77	East of Al Qunfudhah	OTU4	Makkah	Male	77.51	9.4	6.3	9.58	5.07	8.35	4.54	8.97	9.02	7.49	6.83	5.74	8.24	7.51	6.38	8.54	8.3	7.31	9.23	8.17	7.13	11.02	7.19	5.46	8.95	5.11	3.49	2.83	6.97	2.75	2.3	8.97	3.81	3.26	15.32	6.07	4.25	4.74	10.39	14	13	31	31	28	30
78	East of Al Qunfudhah	OTU4	Makkah	Male	81.55	9.96	6.9	9.74	5.39	9.47	4.71	9.07	10	8	6.74	6.02	8.58	7.73	6.71	8.84	8.4	7.49	9.43	8.36	7.36	11.45	7.33	5.71	5.71	5	3.61	2.81	6.91	2.84	2.32	9.64	3.81	3.24	17.41	5.89	4.57	5.12	10.63	14	14	32	31	26	31
[truncated: 18 more columns]
